# Supplementary material for: Assessment of Orally Administered Δ9-Tetrahydrocannabinol When Coadministered With Cannabidiol on Δ9-Tetrahydrocannabinol Pharmacokinetics and Pharmacodynamics in Healthy Adults: A Randomized Clinical Trial
Source: PubMed Central journal article supplement (PMC9926328; doi:10.1001/jamanetworkopen.2022.54752), 2023-02-13

## Supplemental Online Content

Zamarripa CA, Spindle TR, Surujunaraian R, et al. Assessment of orally administered  $\Delta$ 9-tetrahydrocannabinol when coadministered with cannabidiol and  $\Delta$ 9-tetrahydrocannabinol pharmacokinetics and pharmacodynamics in healthy adults: a randomized clinical trial. *JAMA Netw Open*. 2023;6(2):e2254752. doi:10.1001/jamanetworkopen.2022.54752

**eTable 1.** Mean  $\Delta$ 9-THC, 11-OH- $\Delta$ 9-THC, and  $\Delta$ 9-THC-COOH Maximum Concentrations, Time to Maximum Concentration, and Total Area Under-the-Curve Following  $\Delta$ 9-THC and  $\Delta$ 9-THC+CBD Administration

**eTable 2.** Statistical Analyses Results for Pharmacodynamic Outcomes Using Change-From Baseline Data

**eFigure.** Change From Baseline Mean Ratings for the Visual Analog Scale Items on Adverse Outcomes

This supplemental material has been provided by the authors to give readers additional information about their work.

**eTable 1.** Mean  $\Delta$ 9-THC, 11-OH- $\Delta$ 9-THC, and  $\Delta$ 9-THC-COOH Maximum Concentrations, Time to Maximum Concentration, and Total Area Under-the-Curve Following  $\Delta$ 9-THC and  $\Delta$ 9-THC+CBD Administration

|                       | <u>20mg <math>\Delta</math>9-THC + 0mg CBD</u> |                                   |                 | <u>20mg <math>\Delta</math>9-THC + 640mg CBD</u> |                                   |                 |
|-----------------------|------------------------------------------------|-----------------------------------|-----------------|--------------------------------------------------|-----------------------------------|-----------------|
|                       | <b>C<sub>max</sub>, Mean (SD)</b>              | <b>T<sub>max</sub>, h (Range)</b> | <b>AUC (SD)</b> | <b>C<sub>max</sub>, Mean (SD)</b>                | <b>T<sub>max</sub>, h (Range)</b> | <b>AUC (SD)</b> |
| $\Delta$ 9-THC        | 8.2 (4.0)                                      | 2.2 (0.5-4)                       | 33.3 (16.9)     | 14.8 (5.5)                                       | 2.7 (1-6)                         | 84.9 (28.4)     |
| 11-OH- $\Delta$ 9-THC | 4.5 (1.9)                                      | 2.2 (1-4)                         | 34.0 (16.4)     | 53.9 (22.6)                                      | 2.6 (2-4)                         | 349.0 (137.1)   |
| $\Delta$ 9-THC-COOH   | 45.1 (18.5)                                    | 2.6 (1-4)                         | 445.7 (196.2)   | 118.6 (44.8)                                     | 4.1 (2-6)                         | 1030.0 (456.4)  |

Abbreviations: SD = Standard Deviation, h = Hours

**eTable 2.** Statistical Analyses Results for Pharmacodynamic Outcomes Using Change-From Baseline Data

| Outcome Measure                                                                                                                                                                                          | Drug Condition (D)<br><i>F</i> | <i>p</i> | Time (T)<br><i>F</i> | <i>p</i> | D x T <i>F</i> | <i>p</i> |
|----------------------------------------------------------------------------------------------------------------------------------------------------------------------------------------------------------|--------------------------------|----------|----------------------|----------|----------------|----------|
| <b>Subjective Measures</b>                                                                                                                                                                               |                                |          |                      |          |                |          |
| <b>DEQ</b>                                                                                                                                                                                               |                                |          |                      |          |                |          |
| Drug Effect                                                                                                                                                                                              | 25.72                          | <0.0001  | 31.19                | <0.0001  | 12.29          | <0.0001  |
| Unpleasant                                                                                                                                                                                               | 9.67                           | 0.0012   | 11.03                | <0.0001  | 5.71           | 0.0050   |
| Pleasant                                                                                                                                                                                                 | 18.43                          | <0.0001  | 21.06                | <0.0001  | 5.76           | <0.0001  |
| Drug Liking                                                                                                                                                                                              | 11.86                          | 0.0002   | 13.79                | <0.0001  | 3.19           | 0.0075   |
| Sick                                                                                                                                                                                                     | 4.34                           | 0.028    | 4.76                 | 0.0024   | 2.51           | 0.040    |
| Heart Racing                                                                                                                                                                                             | 9.28                           | 0.0016   | 6.22                 | 0.0023   | 3.4            | 0.013    |
| Anxious/Nervous                                                                                                                                                                                          | 5.29                           | 0.011    | 4.96                 | 0.0022   | 2.71           | 0.037    |
| Relaxed                                                                                                                                                                                                  | 0.80                           | 0.45     | 2.07                 | 0.075    | 1.51           | 0.16     |
| Paranoid                                                                                                                                                                                                 | 6.42                           | 0.0065   | 6.31                 | 0.004    | 3.13           | 0.045    |
| Sleepy/Tired                                                                                                                                                                                             | 11.25                          | 0.0004   | 5.45                 | 0.0004   | 1.38           | 0.22     |
| Alert                                                                                                                                                                                                    | 1.16                           | 0.33     | 2.29                 | 0.07     | 1.18           | 0.32     |
| Irritable                                                                                                                                                                                                | 3.39                           | 0.046    | 2.38                 | 0.10     | 2.07           | 0.11     |
| Vigorous/Motivated                                                                                                                                                                                       | 1.44                           | 0.25     | 3.32                 | 0.02     | 1.05           | 0.40     |
| Restless                                                                                                                                                                                                 | 3.27                           | 0.051    | 2.80                 | 0.031    | 1.51           | 0.18     |
| Hungry/Had                                                                                                                                                                                               | 4.49                           | 0.026    | 6.78                 | <0.0001  | 2.05           | 0.072    |
| Cannabis Craving                                                                                                                                                                                         | 1.48                           | 0.24     | 3.16                 | 0.051    | 0.71           | 0.57     |
| Dry Mouth                                                                                                                                                                                                | 12.11                          | 0.0004   | 8.11                 | 0.0001   | 4.53           | 0.0016   |
| Dry/Red Eyes                                                                                                                                                                                             | 5.98                           | 0.0096   | 6.35                 | 0.0022   | 4.32           | 0.0045   |
| Memory Impairment                                                                                                                                                                                        | 8.34                           | 0.0038   | 8.23                 | 0.0004   | 5.13           | 0.0010   |
| Throat Irritation/Coughing                                                                                                                                                                               | 2.30                           | 0.13     | 3.81                 | 0.018    | 2.02           | 0.11     |
| Difficulty Performing Routine Tasks                                                                                                                                                                      | 18.38                          | <0.0001  | 11.46                | <0.0001  | 5.25           | 0.002    |
| <b>Cognitive Measures</b>                                                                                                                                                                                |                                |          |                      |          |                |          |
| DSST                                                                                                                                                                                                     | 1.97                           | 0.17     | 16.89                | <0.0001  | 5.62           | <0.0001  |
| PASAT                                                                                                                                                                                                    | 8.51                           | 0.0038   | 3.24                 | 0.028    | 2.92           | 0.021    |
| DAT                                                                                                                                                                                                      | 14.12                          | 0.0001   | 8.00                 | 0.0015   | 4.70           | 0.0084   |
| <b>Physiological Measures</b>                                                                                                                                                                            |                                |          |                      |          |                |          |
| Heart Rate, beats/min                                                                                                                                                                                    | 13.50                          | <0.0001  | 3.64                 | 0.0065   | 7.76           | 0.0002   |
| Diastolic Blood Pressure, mmHg                                                                                                                                                                           | 0.12                           | 0.88     | 5.42                 | <0.0001  | 1.034          | 0.41     |
| Systolic Blood Pressure, mmHg                                                                                                                                                                            | 1.08                           | 0.35     | 2.75                 | 0.023    | 1.24           | 0.28     |
| Abbreviations: DEQ = drug effect questionnaire, DSST = digit symbol substitution task, DAT = divided attention task, PASAT = paced serial addition task. SD = standard deviation. N=18 for total sample. |                                |          |                      |          |                |          |

**eFigure. Change From Baseline Mean Ratings for the Visual Analog Scale Items on Adverse Outcomes**

○ CYP Cocktail+Placebo □ CYP Cocktail+Δ9-THC ▲ CYP Cocktail+Δ9-THC+CBD

**VAS Score ( $\Delta$  from baseline)**

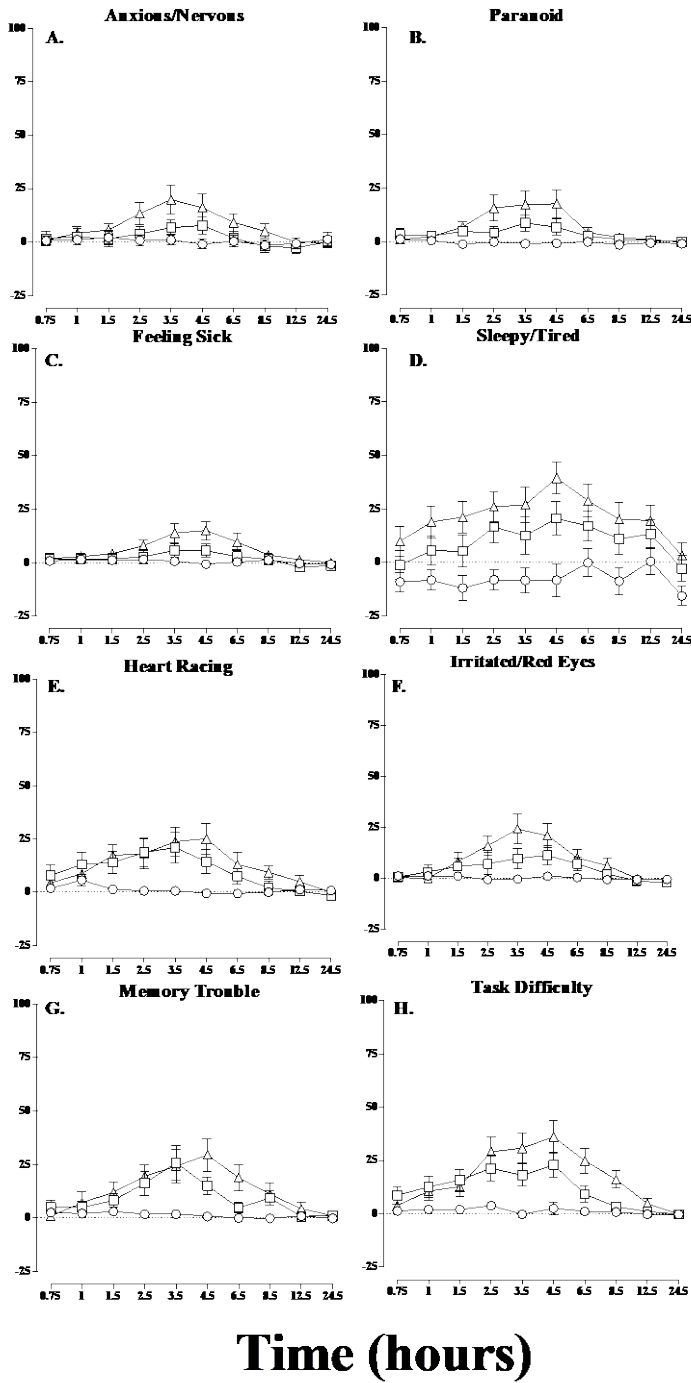

Supplement: jamanetwopen-e2254752-s001.pdf [file jamanetwopen-e2254752-s001.pdf]
