# Supplementary material for: Assessment of Orally Administered Δ9-Tetrahydrocannabinol When Coadministered With Cannabidiol on Δ9-Tetrahydrocannabinol Pharmacokinetics and Pharmacodynamics in Healthy Adults: A Randomized Clinical Trial
Source: PubMed Central journal article supplement (PMC9926328; doi:10.1001/jamanetworkopen.2022.54752), 2023-02-13
Supplement: jamanetwopen-e2254752-s003.pdf [file jamanetwopen-e2254752-s003.pdf]

## **Data Sharing Statement**

### **Data**

**Data available:** No

### **Additional Information**

**Explanation for why data not available:** The data will be made available upon reasonable request by interested parties.
